# Supplementary material for: Prevalence of Untreated Early Childhood Caries of 5-Year-Old Children in Hong Kong: A Cross-Sectional Study
Source: MDPI journal article supplement (doi:10.3390/ijerph182211934), 2021-11-13
Supplement: s1 [file s1]

**Supplementary Table S1.** Published studies on ECC prevalence among 5-year-old children in Hong Kong.

| <b>Year of survey</b>                                          | <b>1986</b>   | <b>1997</b>  | <b>2007</b>  | <b>2009</b>   | <b>2016</b>    |
|----------------------------------------------------------------|---------------|--------------|--------------|---------------|----------------|
| ECC prevalence                                                 | 63%           | 44%          | 48%          | 49%           | 55%            |
| Caries experience (dmft)                                       | 5.1           | 1.8          | 2.0          | 2.2           | 2.7            |
| Untreated ECC prevalence of children with<br>caries experience | -             | > 90%        | 90%          | > 95%         | 93%            |
| Authors [Reference]                                            | Wei et al [8] | Chu et al[9] | Lo et al[10] | Chu et al[11] | Chen et al[12] |
| Year of publication                                            | 1993          | 1999         | 2009         | 2012          | 2017           |

## Supplementary 2. Questionnaire

### Parental Questionnaire

**Please answer all questions. All data and responses will be kept confidential and used only for research and study purposes. Thank you very much!**

#### SECTION 1: Child's oral health-related behaviors

1. How often does your child brush his/her teeth each day?  
☐ Less than once      ☐ Once      ☐ Twice or more
2. Does your child use toothpaste at present?  
☐ No      ☐ Yes
3. On average, how often does your child have a sweet snack between meals at present?  
☐ Less than once a day    ☐ Once a day      ☐ Twice a day      ☐ Three times or more a day
4. Who usually takes care of your child? (Please choose one)  
☐ Parents      ☐ Grandparents      ☐ Domestic helper      ☐ Others (e.g. relatives, friends)
5. Has your child ever seen a dentist?  
☐ Yes, with regular review      ☐ Yes, without regular review      ☐ Never

#### SECTION 2: Child and family information

6. Name of child: \_\_\_\_\_ Gender: ☐ Male    ☐ Female
7. Contact tel. no: \_\_\_\_\_
8. Date of birth: \_\_\_\_\_ / \_\_\_\_\_ / \_\_\_\_\_  
                                         dd           mm           yyyy
9. Place of birth:    ☐ Hong Kong    ☐ Mainland China    ☐ Others (please specify: \_\_\_\_\_)
10. Parent education level:

|                                                       | Father                   | Mother                   |
|-------------------------------------------------------|--------------------------|--------------------------|
| <i>Junior secondary school</i> ( $\leq 9$ years)      | <input type="checkbox"/> | <input type="checkbox"/> |
| <i>Senior secondary school</i> (10-13 years)          | <input type="checkbox"/> | <input type="checkbox"/> |
| <i>Post-secondary / university</i> ( $\geq 14$ years) | <input type="checkbox"/> | <input type="checkbox"/> |
11. Average total monthly household income:  
☐ Below \$15,000  
☐ \$15,001 to \$30,000  
☐ Over \$30,000

**End of questionnaire.**  
**Thank you for your kind participation.**

## 家長問卷調查

請回答所有問題。所有答案及資料都會保密。謝謝！

### 第一部份：子女的口腔衛生習慣

1. 您的子女現時每日刷牙多少次？  
☐ 少於一次      ☐ 每天一次      ☐ 每天兩次或以上
2. 您的子女刷牙時有沒有使用牙膏？  
☐ 有      ☐ 沒有
3. 您的子女每天於正餐以外進食了多少次零食？  
☐ 少於一次      ☐ 每天一次      ☐ 每天兩次      ☐ 每天三次或以上
4. 您的子女通常是由誰照顧？（請選其一）  
☐ 父母      ☐ 祖父母      ☐ 家傭      ☐ 其他（如親戚朋友）
5. 您的子女有沒有看過牙醫？  
☐ 有，定期檢查      ☐ 有，但不是定期檢查      ☐ 沒有

### 第二部份：子女個人及背景資料

6. 子女姓名：\_\_\_\_\_ 性別：☐ 男    ☐ 女
7. 聯絡電話：\_\_\_\_\_
8. 出生日期：\_\_\_\_\_年 \_\_\_\_\_月 \_\_\_\_\_日
9. 出生地點：☐ 香港      ☐ 中國內地      ☐ 其他，請註明：  
\_\_\_\_\_
10. 家長的教育程度：

|                 | 父                        | 母                        |
|-----------------|--------------------------|--------------------------|
| 初中（在學9年或以下）     | <input type="checkbox"/> | <input type="checkbox"/> |
| 高中（在學10至13年）    | <input type="checkbox"/> | <input type="checkbox"/> |
| 大專或大學（在學14年或以上） | <input type="checkbox"/> | <input type="checkbox"/> |
11. 家庭平均每月收入：  
☐ \$15,000 以下  
☐ \$15,001 至 \$30,000  
☐ \$30,001 或以上

問卷完  
多謝你的參與
